# Supplementary material
Source: Springer Nature journal article supplement (https://www.springermedizin.de/resource/supplementary/12913_2007_587_MOESM4_ESM.pdf/9535484)
Supplement: MOESM4 [file 9535484]

**HR directorate:**

- Management styles;
- Working environment

**Public Service:**

- Salaries
- Secondary employment
- Working conditions

**Ministry of Health:**

- Career opportunities
- Recruitment

**Other ministries**

(responsible for education, finance, transport, housing, security):

- Infrastructure
- Continuing education
- Recruitment
